# Supplementary material for: Design of nanocomposites with cobalt encapsulated in the zeolite micropores for selective synthesis of isoparaffins in Fischer–Tropsch reaction
Source: Royal Society of Chemistry journal article supplement (doi:10.1039/c7cy01945a), 2017-01-01
Supplement: c7cy01945a1.pdf [file c7cy01945a1.pdf]

Supporting Information for  
**Design of nanocomposites with cobalt encapsulated in the zeolite micropores for selective synthesis of isoparaffins in Fischer-Tropsch reaction**

Alexandre Carvalho,<sup>[a]</sup> Maya Marinova,<sup>[b]</sup> Nuno Batalha,<sup>[a]</sup> Nilson R. Marcilio<sup>[b]</sup>, Andrei Y. Khodakov<sup>[a]\*</sup> and Vitaly V. Ordomsky<sup>[a,c]\*</sup>

<sup>a</sup> Univ. Lille, CNRS, Centrale Lille, ENSCL, Univ. Artois, UMR 8181 - UCCS - Unité de Catalyse et Chimie du Solide, F-59000 Lille, France

<sup>b</sup> Department of Chemical Engineering, Federal University of Rio Grande do Sul, Porto Alegre, RS, 90040-040, Brazil

<sup>c</sup> Institut Chevreul, FR2638 CNRS, Bât. C6 Université Lille 1, F-59655 Villeneuve d'Ascq, France

<sup>d</sup> Eco-Efficient Products and Processes Laboratory (E2P2L), UMI 3464 CNRS-Solvay, Shanghai, P.R. China

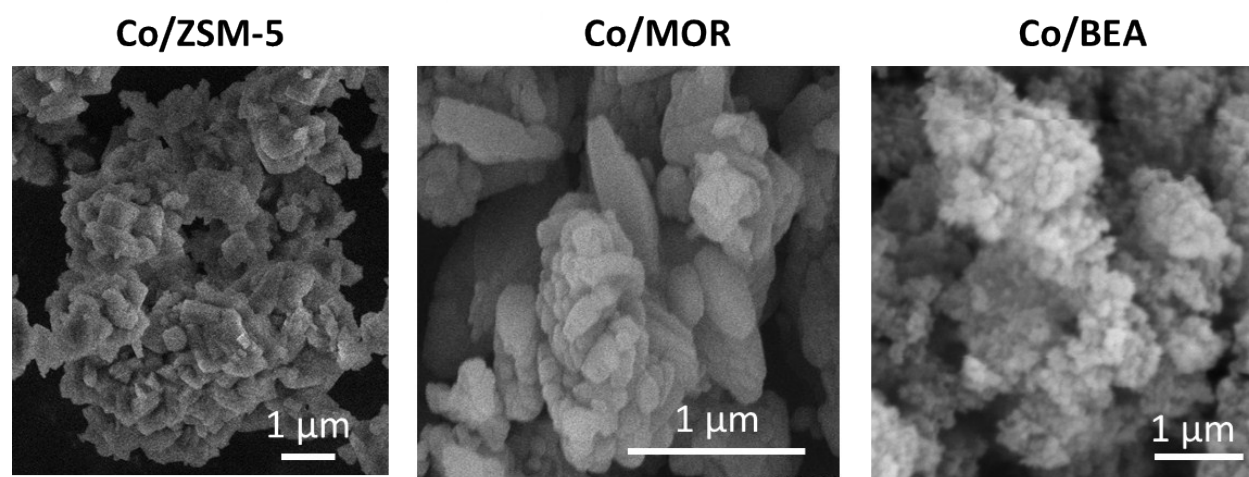

*Figure S1. SEM images of zeolites*

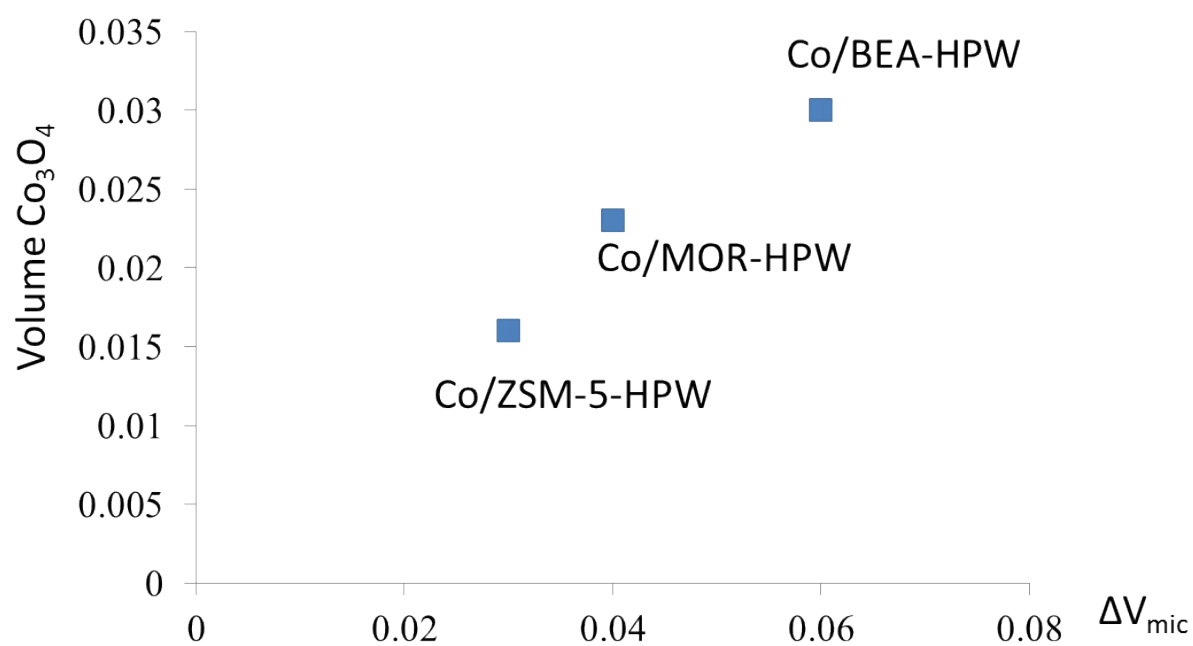

Figure S2. Correlation between decrease of the microporous volume of Co/Zeolite-HPW in comparison with parent zeolite and theoretical volume of the introduced Co

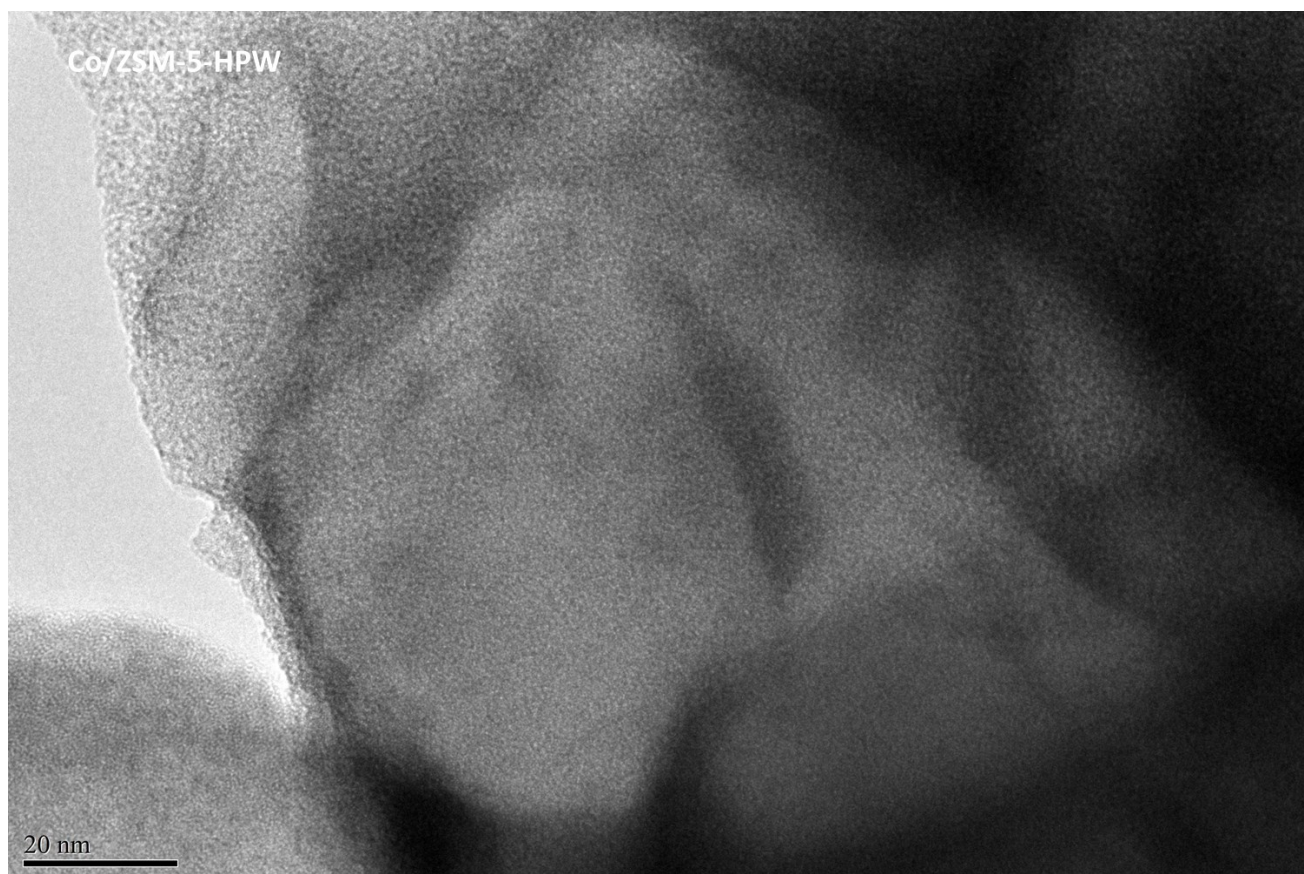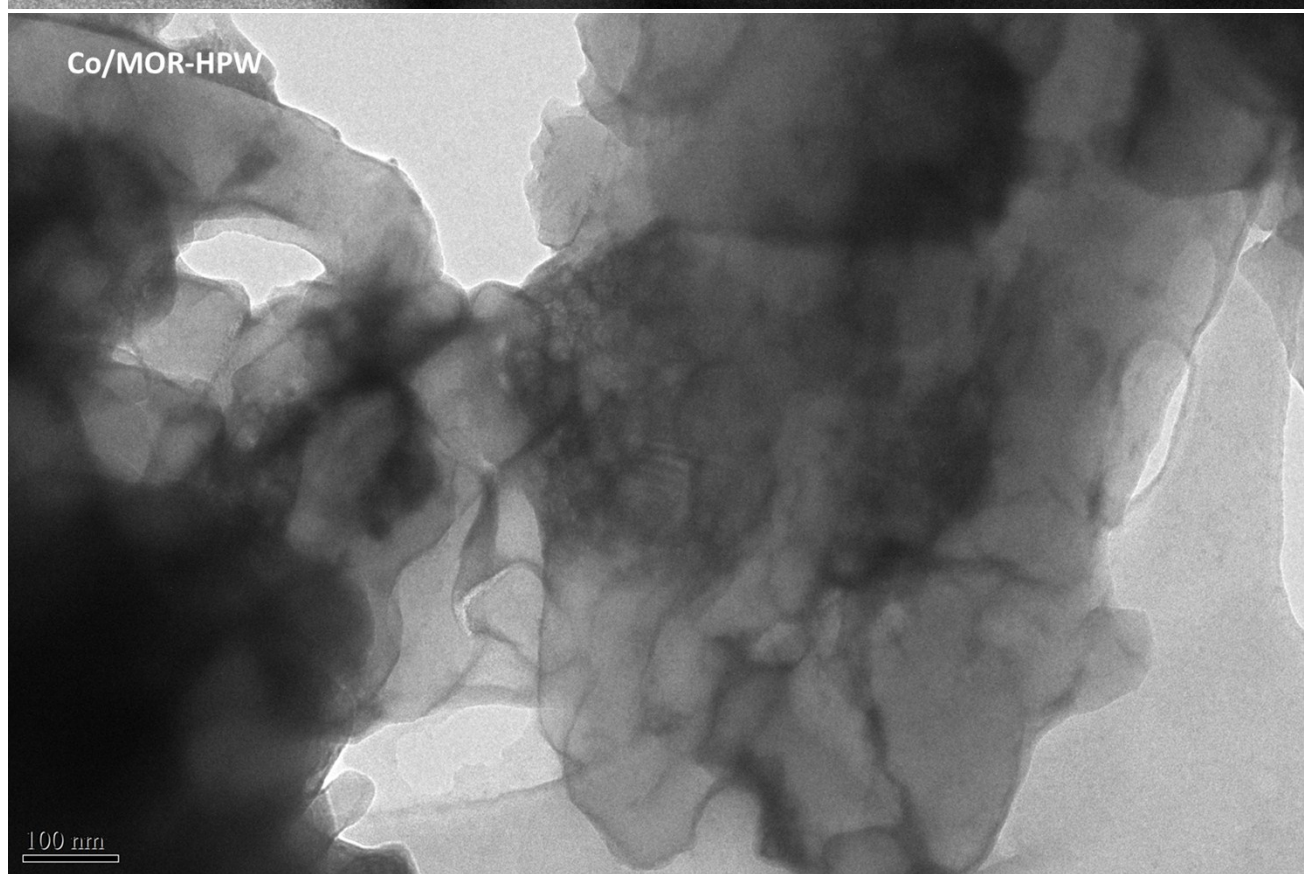

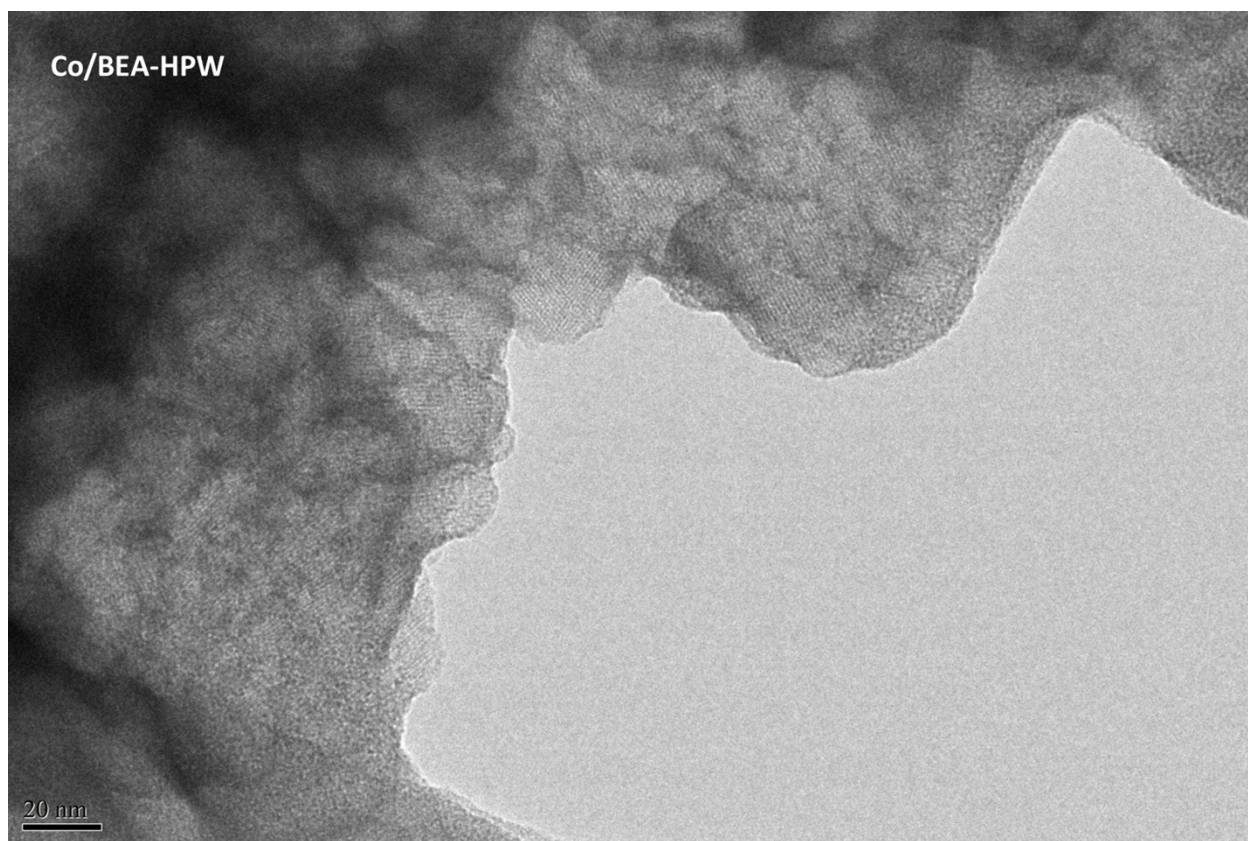

*Figure S3. TEM image of the catalysts after HPW treatment*

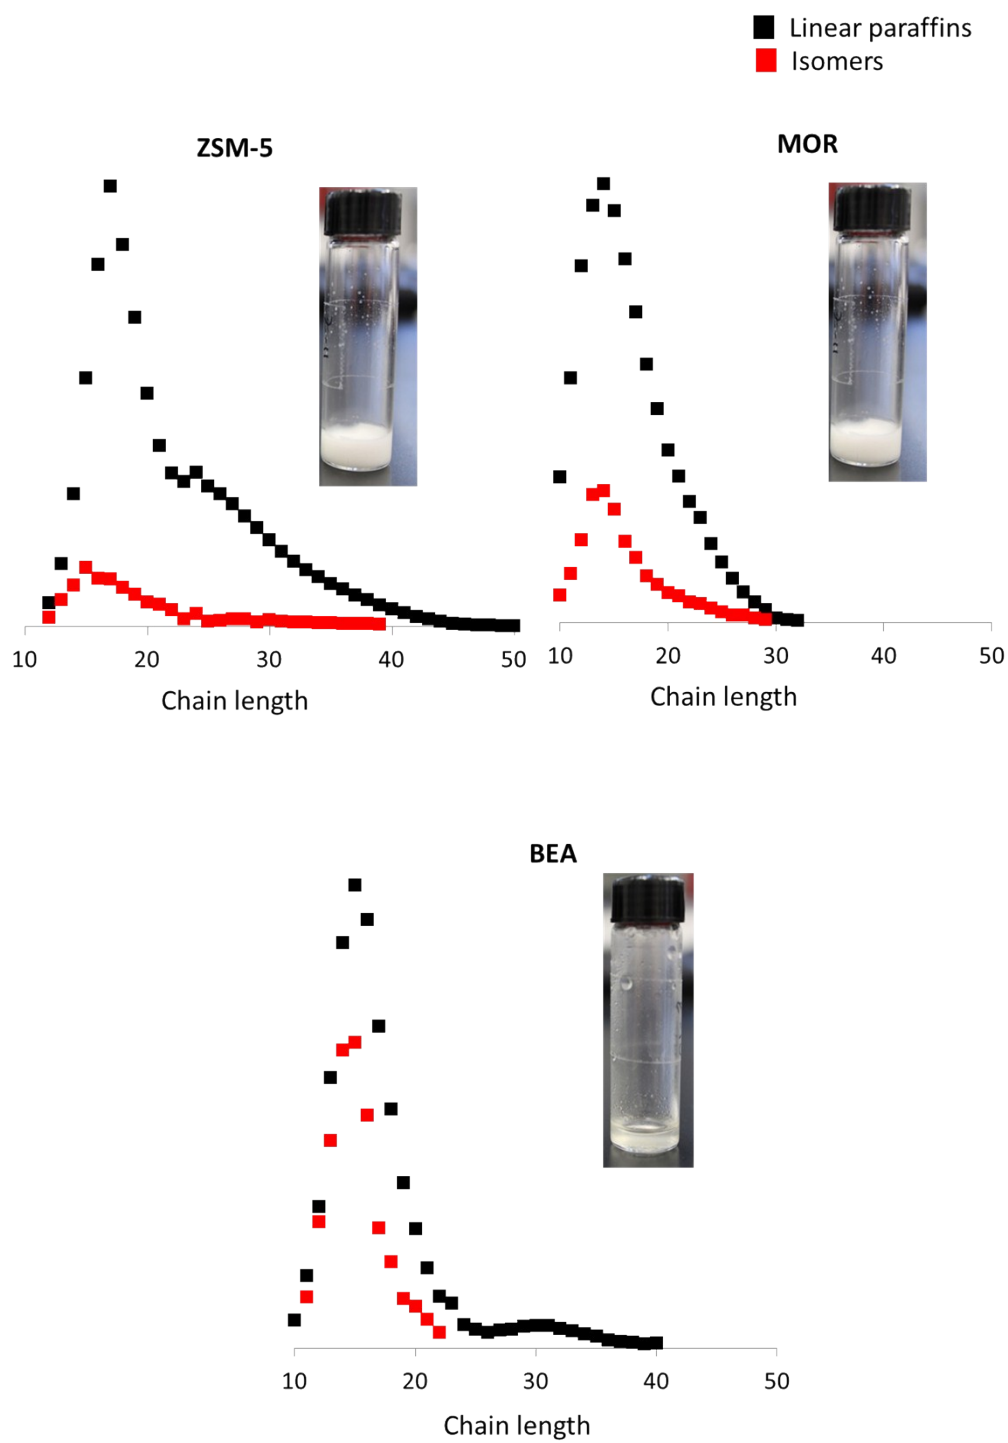

Figure S4. Hydrocarbon distribution in liquid products

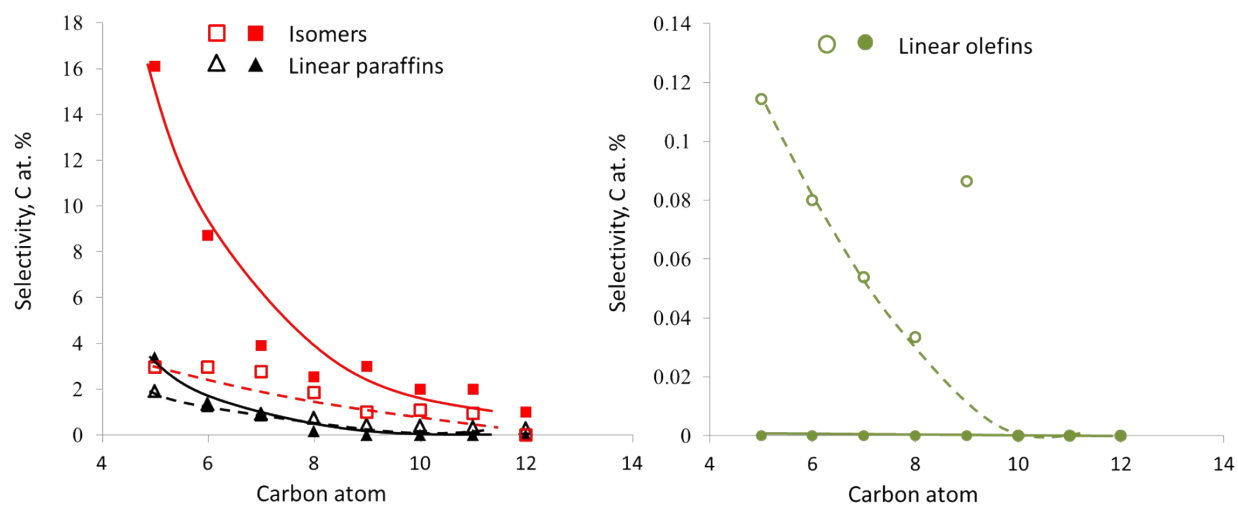

Figure S5. Distribution of isomers, linear paraffins and linear olefins depending on the chain length for Co/ZSM-5 (open symbols) and Co/ZSM-5-HPW (filled symbols).

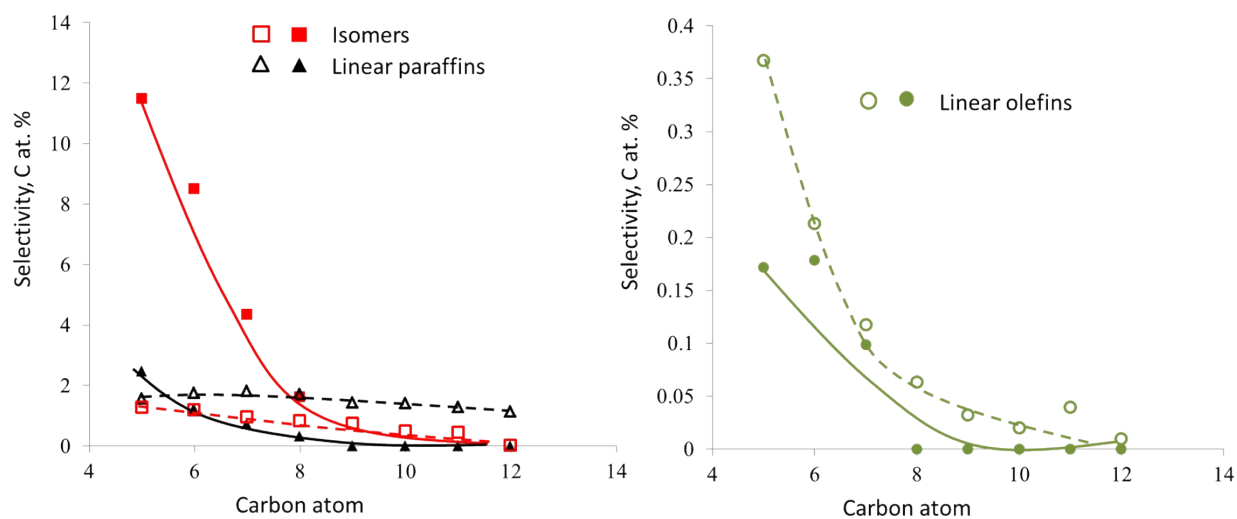

Figure S6. Distribution of isomers, linear paraffins and linear olefins depending on the chain length for Co/MOR (open symbols) and Co/MOR-HPW (filled symbols).

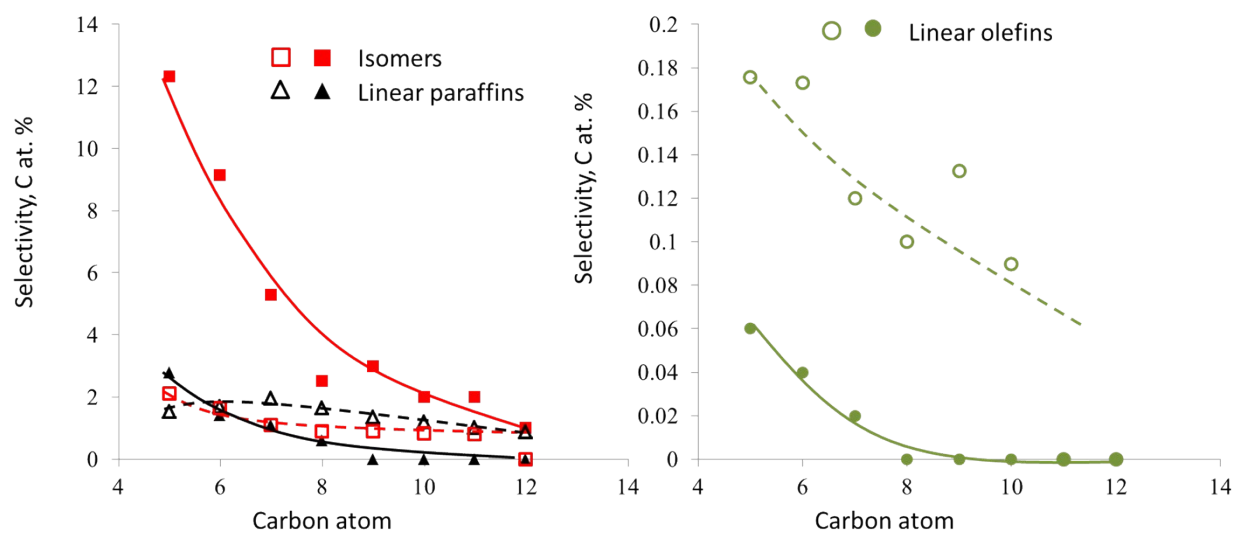

Figure S7. Distribution of isomers, linear paraffins and linear olefins depending on the chain length for Co/BEA (open symbols) and Co/BEA-HPW (filled symbols).

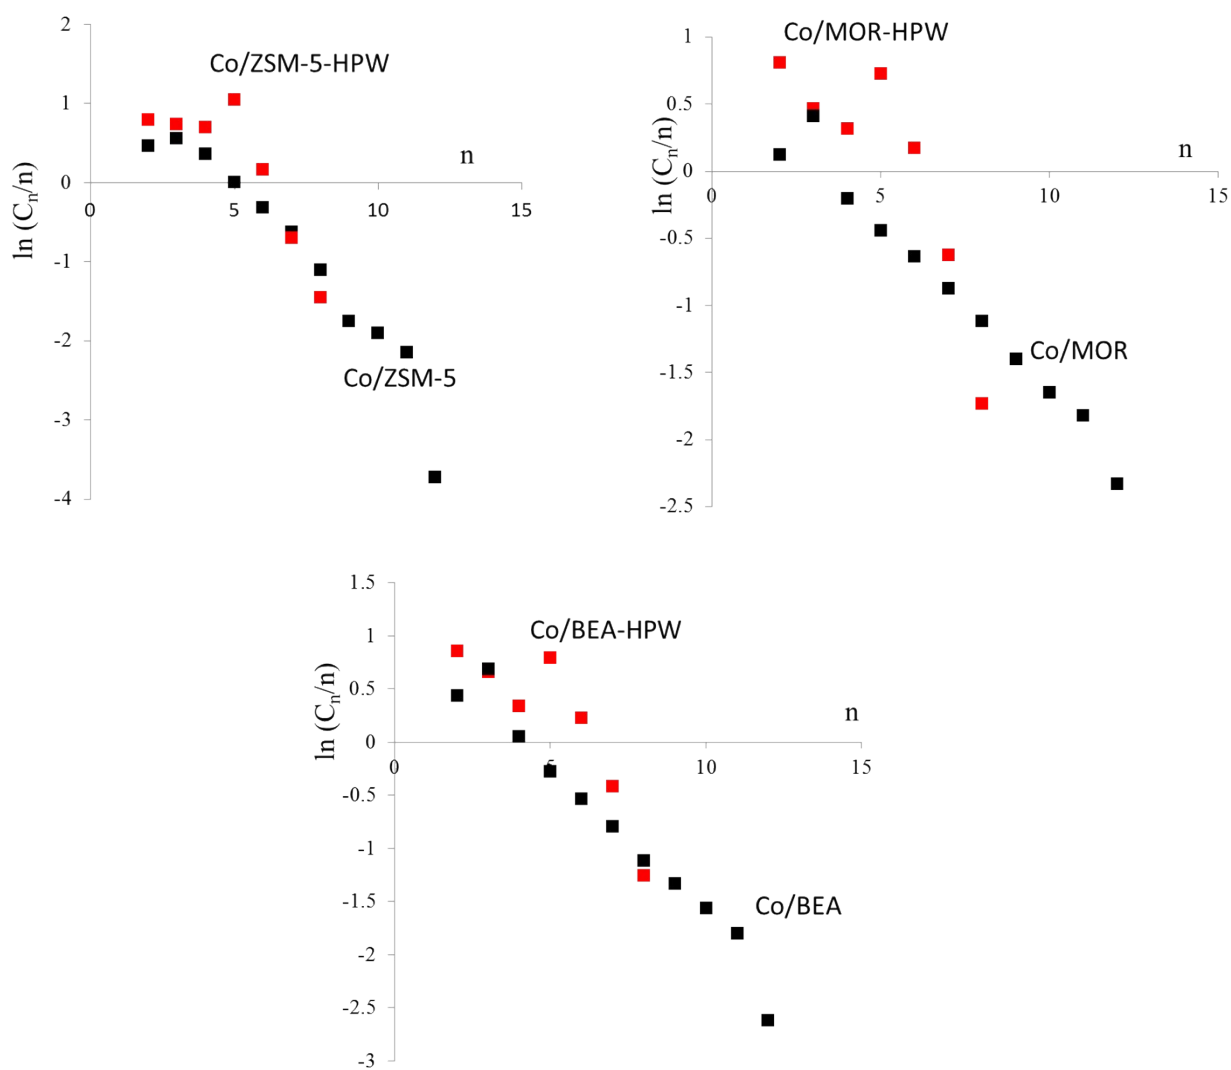

Figure S8. Anderson-Schulz-Flory SF distribution of hydrocarbons produced in Fischer-Tropsch synthesis over Co/Zeolite nanocomposites before and after HPW treatment
